# Supplementary material for: Chanling Gao Attenuates Bone Cancer Pain in Rats by the IKKβ/NF-κB Signaling Pathway
Source: PubMed Central journal article supplement (PMC7214814; doi:10.3389/fphar.2020.00525), 2020-05-05
Supplement: Image_1.pdf [file Image_1.pdf]

RT: 0.00 - 50.01  
0.90

NL:  
7.37E9  
TIC F: FTMS  
+ p ESI Full  
ms  
[100.0000-  
1500.0000]  
MS CLG

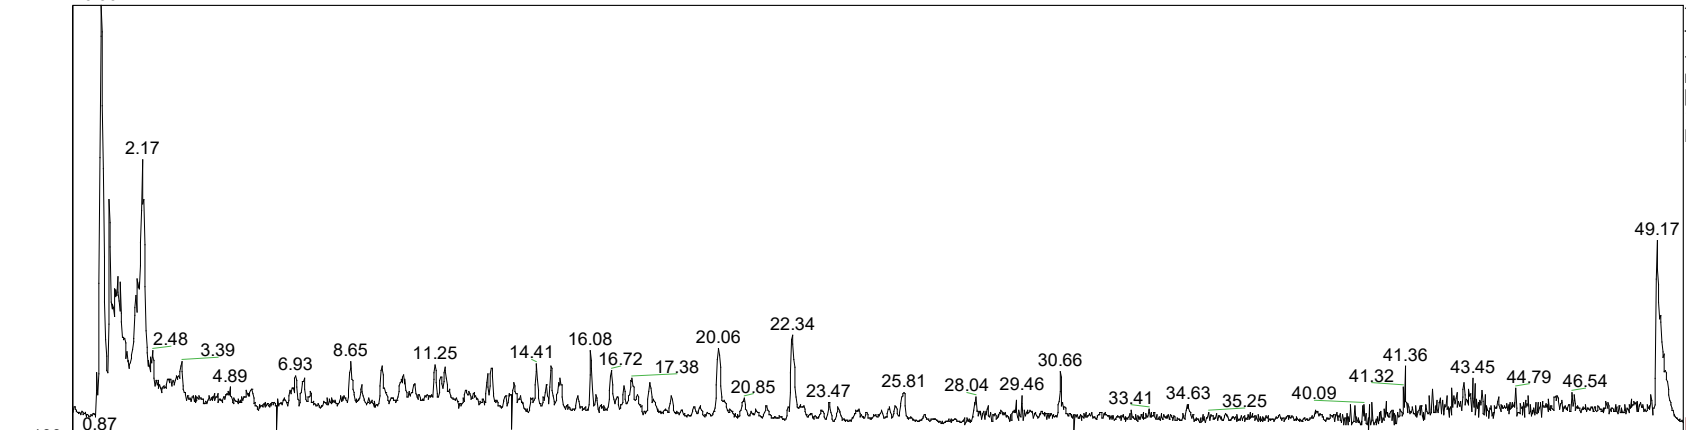

NL:  
1.56E9  
TIC F: FTMS -  
p ESI Full ms  
[100.0000-  
1500.0000]  
MS CLG

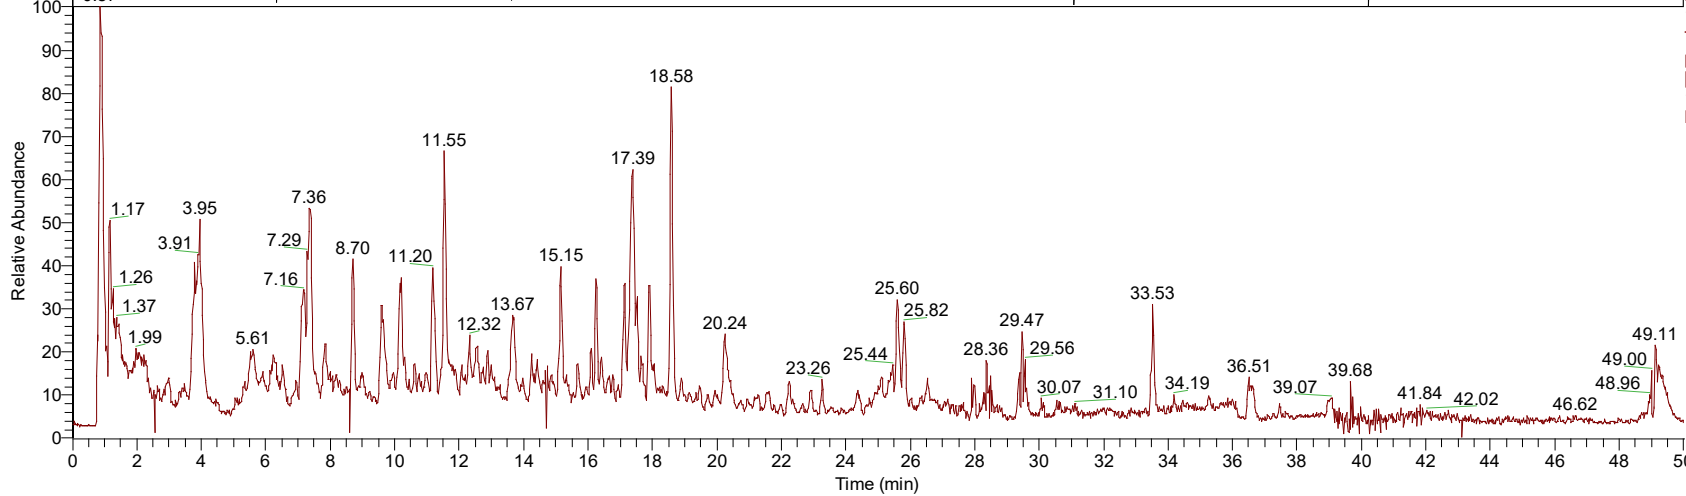

CLG HPLC mass spectrum
